# Supplementary material for: Digital Care Programs for Chronic Hip Pain: A Prospective Longitudinal Cohort Study
Source: MDPI journal article supplement (doi:10.3390/healthcare10081595), 2022-08-22
Supplement: s1 [file s1]

# Digital care programs for chronic hip pain: a prospective longitudinal cohort study

Dora Janela, Fabíola Costa, Anabela C. Areias, Maria Molinos, Robert G. Moulder, Jorge Lains, Virgílio Bento, Justin K Scheer, Vijay Yanamadala, Steven P. Cohen, Fernando Dias Correia

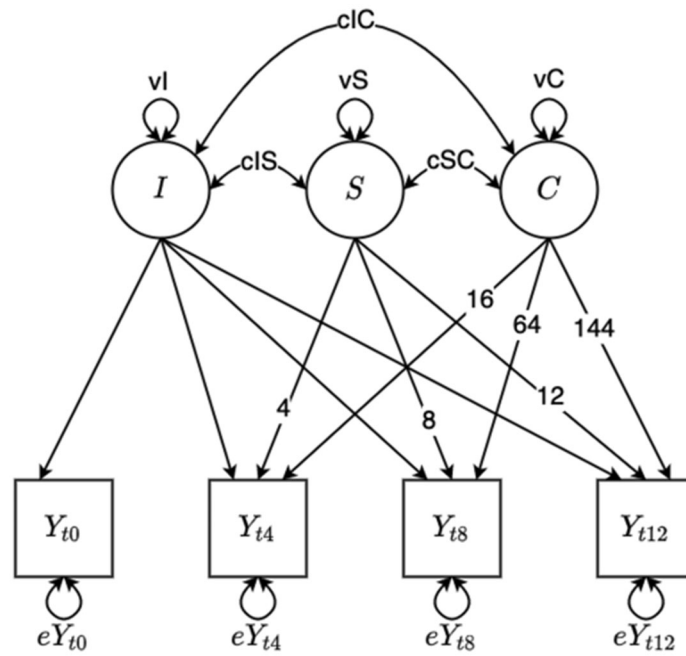

**Supplementary Figure S1.** Example path diagram for the LGC models used in the current study. LGCs are a form of structural equation model for modeling longitudinal processes. Squares represent outcome variables at baseline, 4 weeks, 8 weeks, and 12 weeks. Circles represent average latent intercept (I), slope (S), and curvature (C) components across all participants. Single-headed arrows represent fixed loadings relating the outcome variables to the latent components. Double-headed arrows represent either variance, covariance, or error variance parameters: variance of the intercept (vI), slope (vS) and curvature (vC); covariance between intercept and slope (cIS), slope and curvature (cSC), and intercept and curvature (cIC); error variance across measurement time points - at baseline ( $eY_{t0}$ ), 4 ( $eY_{t4}$ ), 8 ( $eY_{t8}$ ) and 12 ( $eY_{t12}$ ) weeks.

Latent growth curve (LGC) models take the form:

$$Y_{ij} = I + St_i + Ct_i + u_{0j} + u_{1j}t_i + u_{2j}t_i^2 + e_{ij}$$

where  $Y$  is the outcome score for person,  $j$ , at time,  $i$ ,  $t_i$  is a vector of time points representing [0, 4, 8, 12] weeks,  $I$  is an intercept term representing the average value at  $t=0$  for all participants,  $S$  is a slope term representing the

average linear change of  $Y_{ij}$  over time for all participants,  $C$  is a curvature term representing the quadratic change over time of  $Y_{ij}$  for all participants,  $u_{ij}$  is a random intercept term representing individual participant variation in  $I$ ,  $u_{ij}$  is a random slope term representing individual participant variation in  $S$ ,  $u_{ij}$  is a random curvature term representing individual participant variation in  $C$ , and  $e_{ij}$  is an error term (see Supplementary Figure 1).

**Supplementary Table S1.** Baseline characteristics of completers vs non-completers.

| Characteristic                      | Completers<br>(N=396) | Non-completers<br>(N=138) | p               |
|-------------------------------------|-----------------------|---------------------------|-----------------|
| Age (years), mean (SD)              | 50.7 (11.2)           | 48.7 (11.4)               | <b>.002</b>     |
| Age categories, N (%):              |                       |                           | .090            |
| <25                                 | 3 (0.8)               | 0 (0.0)                   |                 |
| 25-40                               | 83 (21.0)             | 39 (28.3)                 |                 |
| 40-60                               | 215 (54.3)            | 77 (55.8)                 |                 |
| > 60                                | 95 (24.0)             | 22 (15.9)                 |                 |
| Sex, N (%):                         |                       |                           | .801            |
| Female                              | 268 (67.7)            | 95 (68.8)                 |                 |
| Male                                | 128 (32.3)            | 43 (31.2)                 |                 |
| BMI, mean (SD) <sup>a</sup>         | 27.6 (5.7)            | 28.1 (5.3) <sup>a</sup>   | .416            |
| BMI categories, N (%):              |                       |                           | .150            |
| Underweight (<18.5)                 | 0 (0.0)               | 2 (0.5)                   |                 |
| Normal (18.5-25)                    | 32 (23.4)             | 115 (29.2)                |                 |
| Overweight (25-30)                  | 43 (31.4)             | 145 (36.8)                |                 |
| Obese (30-40)                       | 50 (36.5)             | 109 (27.7)                |                 |
| Morbidly obese (>40)                | 12 (8.8)              | 23 (5.8)                  |                 |
| Laterality, N (%):                  |                       |                           | .595            |
| right                               | 141 (35.6)            | 44 (31.9)                 |                 |
| left                                | 107 (27.0)            | 43 (31.1)                 |                 |
| both                                | 148 (37.4)            | 51 (37.0)                 |                 |
| Employment status, N (%):           |                       |                           | .732            |
| Employed (part-time or full-time)   | 357 (90.2)            | 123 (89.1)                |                 |
| Unemployed                          | 39 (9.8)              | 15 (10.9)                 |                 |
| Hip pain-related condition, N (%):  |                       |                           | .400            |
| Hip Osteoarthritis                  | 82 (20.7)             | 24 (17.4)                 |                 |
| Others <sup>a</sup>                 | 314 (79.3)            | 114 (82.6)                |                 |
| Psychopathology comorbidity, N (%): |                       |                           |                 |
| GAD-7 $\geq$ 5                      | 94 (23.7%)            | 41 (29.7%)                | .164            |
| GAD-7 $\geq$ 10                     | 30 (7.6%)             | 16 (11.6%)                | .147            |
| PHQ-9 $\geq$ 5                      | 65 (16.4%)            | 37 (26.8%)                | <b>.007</b>     |
| PHQ-9 $\geq$ 10                     | 14 (3.5%)             | 20 (14.5%)                | <b>&lt;.001</b> |
| Outcome measures, mean (SD):        |                       |                           |                 |
| HOOS-Pain <sup>b</sup>              | 65.5 (14.3)           | 65.7 (15.6)               | .848            |
| HOOS-Function <sup>c</sup>          | 75.1 (14.2)           | 75.1 (16.3)               | .987            |
| HOOS-Qol <sup>b</sup>               | 52.5 (18.3)           | 52.5 (18.2)               | .969            |
| HOOS-Sport <sup>c</sup>             | 65.3 (20.8)           | 66.3 (22.1)               | .749            |

|                |             |             |             |
|----------------|-------------|-------------|-------------|
| HOOS-Symptoms  | 68.7 (15.6) | 66.7 (16.1) | .400        |
| Pain Level     | 4.8 (1.9)   | 5.0 (1.9)   | .160        |
| Surgery Intent | 8.9 (19.5)  | 8.9 (19.8)  | .983        |
| GAD-7          | 2.8 (3.9)   | 3.7 (5.4)   | .099        |
| PHQ-9          | 2.3 (3.6)   | 3.7 (5.9)   | <b>.009</b> |
| WPAI Overall   | 15.5 (21.6) | 18.1 (23.2) | .298        |
| WPAI Work      | 14.6 (20.1) | 17.2 (22.6) | .250        |
| WPAI Time      | 2.3 (12.2)  | 3.6 (15.0)  | .342        |
| WPAI Activity  | 25.5 (24.2) | 28.5 (27.5) | .257        |

*Abbreviations:* BMI, Body mass index; HOOS, Hip Disability and Osteoarthritis Outcome Score; GAD-7, Generalized Anxiety Disorder 7-item scale; PHQ-9, Patient Health 9-item questionnaire; WPAI, Work Productivity and Activity Impairment Questionnaire. Missing data: a: N=3; b: N=19; c: N=283. d: other conditions include non-specific pain, bursitis, femoroacetabular syndrome, sprain/strain, gluteal tendinopathy, etc. Note: Significant p-values are presented in bold.

**Supplementary Table S2.** Intent-to-treat Conditional Latent Growth Curve Model, with age, sex and body mass index as covariates.

| Outcome           | Age                                  |                                  |                              | Female                           |                                  |                                 | BMI                                  |                                 |                                  |
|-------------------|--------------------------------------|----------------------------------|------------------------------|----------------------------------|----------------------------------|---------------------------------|--------------------------------------|---------------------------------|----------------------------------|
|                   | Intercept                            | Slope                            | Curve                        | Intercept                        | Slope                            | Curve                           | Intercept                            | Slope                           | Curve                            |
| Hoos-Pain         | <b>-0.20</b><br>( <b>&lt; .001</b> ) | 0.02<br>(0.262)                  | 0<br>(0.422)                 | <b>-4.15</b><br>( <b>0.002</b> ) | <b>1.00</b><br>( <b>0.016</b> )  | -0.05<br>(0.116)                | <b>-0.39</b><br>( <b>&lt; .001</b> ) | -0.02<br>(0.568)                | 0<br>(0.401)                     |
| Hoos-Function     | <b>-0.24</b><br>( <b>0.002</b> )     | 0.02<br>(0.338)                  | 0<br>(0.712)                 | <b>-5.44</b><br>( <b>0.005</b> ) | 0.90<br>(0.080)                  | -0.03<br>(0.523)                | <b>-0.63</b><br>( <b>&lt; .001</b> ) | <b>0.14</b><br>( <b>0.003</b> ) | <b>-0.01</b><br>( <b>0.003</b> ) |
| Hoos-Qol          | -0.13<br>(0.066)                     | 0.03<br>(0.193)                  | 0<br>(0.184)                 | -0.73<br>(0.681)                 | -0.12<br>(0.803)                 | 0.03<br>(0.436)                 | <b>-0.35</b><br>( <b>0.005</b> )     | 0.03<br>(0.470)                 | 0<br>(0.223)                     |
| Hoos-Sport        | -0.11<br>(0.307)                     | -0.02<br>(0.568)                 | 0<br>(0.476)                 | -3.04<br>(0.254)                 | -0.35<br>(0.655)                 | 0.06<br>(0.300)                 | <b>-0.48</b><br>( <b>0.036</b> )     | 0.09<br>(0.286)                 | -0.01<br>(0.170)                 |
| Hoos-Symptoms     | -0.02<br>(0.808)                     | 0.01<br>(0.698)                  | 0<br>(0.920)                 | -3.87<br>(0.062)                 | 0.30<br>(0.603)                  | 0.01<br>(0.839)                 | <b>-0.46</b><br>( <b>0.015</b> )     | <b>0.13</b><br>( <b>0.015</b> ) | <b>-0.01</b><br>( <b>0.005</b> ) |
| Pain Level        | <b>0.03</b><br>( <b>&lt; .001</b> )  | <b>-0.01</b><br>( <b>0.012</b> ) | <b>0</b><br>( <b>0.016</b> ) | <b>0.37</b><br>( <b>0.032</b> )  | -0.05<br>(0.388)                 | 0<br>(0.638)                    | <b>0.04</b><br>( <b>0.001</b> )      | 0<br>(0.437)                    | 0<br>(0.436)                     |
| Surgery Intent >0 | 0.03<br>(0.892)                      | 0.02<br>(0.610)                  | 0<br>(0.658)                 | -2.85<br>(0.447)                 | <b>-1.93</b><br>( <b>0.011</b> ) | <b>0.16</b><br>( <b>0.001</b> ) | 0.51<br>(0.071)                      | 0.05<br>(0.406)                 | 0<br>(0.310)                     |
| Surgery Intent    | 0.14<br>(0.071)                      | -0.01<br>(0.461)                 | 0<br>(0.995)                 | -3.19<br>(0.102)                 | <b>-0.80</b><br>( <b>0.047</b> ) | <b>0.07</b><br>( <b>0.008</b> ) | <b>0.29</b><br>( <b>0.041</b> )      | 0.01<br>(0.677)                 | 0<br>(0.616)                     |
| GAD-7 ≥ 5         | <b>-0.07</b><br>( <b>0.019</b> )     | 0.01<br>(0.484)                  | 0<br>(0.310)                 | -0.08<br>(0.931)                 | -0.07<br>(0.816)                 | 0.01<br>(0.696)                 | 0.04<br>(0.544)                      | -0.01<br>(0.684)                | 0<br>(0.543)                     |
| GAD-7             | <b>-0.06</b><br>( <b>&lt; .001</b> ) | 0<br>(0.308)                     | 0<br>(0.325)                 | 0.62<br>(0.115)                  | -0.02<br>(0.835)                 | 0<br>(0.970)                    | <b>0.07</b><br>( <b>0.036</b> )      | 0<br>(0.692)                    | 0<br>(0.255)                     |
| PHQ-9 ≥ 5         | -0.05<br>(0.177)                     | -0.02<br>(0.325)                 | 0<br>(0.384)                 | -1.58<br>(0.141)                 | -0.19<br>(0.723)                 | 0.02<br>(0.624)                 | 0.10<br>(0.182)                      | -0.01<br>(0.711)                | 0<br>(0.981)                     |
| PHQ-9             | -0.03<br>(0.062)                     | 0<br>(0.429)                     | 0<br>(0.433)                 | -0.23<br>(0.588)                 | 0.06<br>(0.561)                  | -0.01<br>(0.414)                | <b>0.10</b><br>( <b>0.006</b> )      | 0<br>(0.639)                    | 0<br>(0.535)                     |
| WPAI Overall >0   | <b>-0.30</b><br>( <b>0.011</b> )     | -0.01<br>(0.851)                 | 0<br>(0.620)                 | -1.74<br>(0.579)                 | -0.47<br>(0.665)                 | 0<br>(0.957)                    | 0.30<br>(0.179)                      | -0.1<br>(0.228)                 | 0.01<br>(0.340)                  |
| WPAI Overall      | <b>-0.21</b><br>( <b>0.028</b> )     | 0<br>(0.975)                     | 0<br>(0.574)                 | 0.02<br>(0.992)                  | -0.5<br>(0.456)                  | 0.03<br>(0.544)                 | <b>0.41</b><br>( <b>0.021</b> )      | -0.03<br>(0.703)                | 0<br>(0.696)                     |

|                  |                                |                  |              |                  |                  |                 |                                  |                  |                 |
|------------------|--------------------------------|------------------|--------------|------------------|------------------|-----------------|----------------------------------|------------------|-----------------|
| WPAI Work >0     | <b>-0.23</b><br><b>(0.034)</b> | -0.03<br>(0.548) | 0<br>(0.385) | -2.18<br>(0.479) | -0.75<br>(0.458) | 0.03<br>(0.732) | <b>0.42</b><br><b>(0.040)</b>    | -0.13<br>(0.080) | 0.01<br>(0.146) |
| WPAI Work        | <b>-0.17</b><br><b>(0.043)</b> | -0.01<br>(0.634) | 0<br>(0.256) | -0.53<br>(0.800) | -0.65<br>(0.306) | 0.06<br>(0.314) | <b>0.43</b><br><b>(0.011)</b>    | -0.05<br>(0.418) | 0<br>(0.380)    |
| WPAI Activity >0 | 0.12<br>(0.192)                | -0.05<br>(0.224) | 0<br>(0.233) | 2.32<br>(0.351)  | -1.08<br>(0.259) | 0.03<br>(0.675) | <b>0.41</b><br><b>(0.020)</b>    | -0.11<br>(0.120) | 0.01<br>(0.112) |
| WPAI Activity    | 0.04<br>(0.654)                | -0.02<br>(0.464) | 0<br>(0.384) | 3.9 (0.088)      | -1.28<br>(0.087) | 0.08<br>(0.181) | <b>0.63</b><br><b>(&lt;.001)</b> | -0.12<br>(0.055) | 0.01<br>(0.071) |

**Abbreviations:** HOOS, Hip Disability and Osteoarthritis Outcome Score; GAD-7, Generalized Anxiety Disorder 7-item scale; PHQ-9, Patient Health 9-item questionnaire; WPAI, Work Productivity and Activity Impairment Questionnaire. Note: Significant *p*-values are presented in bold.

**Supplementary Table S3.** Latent Growth Curve analysis: intent-to-treat.

|                        |     | Intercept        |                  | Slope           |                  | Curve           |                  | Fit                |              |              |             |              |
|------------------------|-----|------------------|------------------|-----------------|------------------|-----------------|------------------|--------------------|--------------|--------------|-------------|--------------|
| Outcome                | N   | Mean<br>(SD)     | P                | Mean<br>(SD)    | P                | Mean<br>(SD)    | P                | Chi-<br>sq<br>(df) | p            | RMSEA        | CFI         | SRMR         |
| HOOS-Pain              | 515 | 65.59<br>(12.16) | <<br><b>.001</b> | 1.75<br>(2.07)  | <<br><b>.001</b> | -0.05<br>(0.15) | <b>0.001</b>     | 0.2<br>(1)         | <b>0.656</b> | <b>0.000</b> | <b>1.00</b> | <b>0.004</b> |
| HOOS-<br>Function      | 251 | 75.08<br>(14.84) | <<br><b>.001</b> | 1.67<br>(2.01)  | <<br><b>.001</b> | -0.06<br>(0.12) | <b>0.002</b>     | 0.48<br>(1)        | <b>0.488</b> | <b>0.000</b> | <b>1.00</b> | <b>0.008</b> |
| HOOS-QoL               | 515 | 52.44<br>(16.20) | <<br><b>.001</b> | 1.52<br>(2.22)  | <<br><b>.001</b> | -0.03<br>(0.13) | 0.152            | 4.18<br>(1)        | 0.041        | <b>0.078</b> | <b>0.99</b> | <b>0.017</b> |
| HOOS-<br>Sport         | 251 | 65.37<br>(20.16) | <<br><b>.001</b> | 1.92<br>(3.65)  | <<br><b>.001</b> | -0.07<br>(0.24) | <b>0.030</b>     | 0.56<br>(1)        | <b>0.455</b> | <b>0.000</b> | <b>1.00</b> | <b>0.009</b> |
| HOOS-<br>Symptoms      | 251 | 68.18<br>(15.08) | <<br><b>.001</b> | 1.10<br>(2.77)  | <<br><b>.001</b> | -0.02<br>(0.18) | 0.407            | 0.96<br>(1)        | <b>0.327</b> | <b>0.000</b> | <b>1.00</b> | <b>0.012</b> |
| Pain Level             | 534 | 4.82<br>(1.81)   | <<br><b>.001</b> | -0.45<br>(0.39) | <<br><b>.001</b> | 0.02<br>(0.03)  | <<br><b>.001</b> | 26.06<br>(1)       | <<br>.001    | 0.217        | <b>0.91</b> | 0.059        |
| Surgery In-<br>tent >0 | 201 | 23.67<br>(25.8)  | <<br><b>.001</b> | -2.74<br>(4.21) | <<br><b>.001</b> | 0.11<br>(0.22)  | <<br><b>.001</b> | 6.63<br>(1)        | 0.010        | 0.167        | <b>0.98</b> | <b>0.048</b> |
| Surgery In-<br>tent    | 534 | 8.84<br>(18.52)  | <<br><b>.001</b> | -0.81<br>(2.93) | <<br><b>.001</b> | 0.03<br>(0.16)  | <b>0.009</b>     | 9.04<br>(1)        | 0.003        | 0.123        | <b>0.99</b> | <b>0.043</b> |
| GAD-7 ≥ 5              | 135 | 9.19<br>(4.46)   | <<br><b>.001</b> | -0.80<br>(0.99) | <<br><b>.001</b> | 0.03<br>(0.05)  | <b>0.009</b>     | 0.85<br>(1)        | <b>0.357</b> | <b>0.000</b> | <b>1.00</b> | <b>0.036</b> |
| GAD-7                  | 534 | 3.05<br>(4.26)   | <<br><b>.001</b> | -0.13<br>(0.72) | <b>0.013</b>     | 0.00<br>(0.03)  | 0.484            | 5.53<br>(1)        | 0.019        | 0.092        | <b>0.99</b> | <b>0.021</b> |
| PHQ-9 ≥ 5              | 102 | 9.86<br>(5.20)   | <<br><b>.001</b> | -1.14<br>(1.49) | <<br><b>.001</b> | 0.06<br>(0.09)  | <b>0.001</b>     | 0.84<br>(1)        | <b>0.360</b> | <b>0.000</b> | <b>1.00</b> | <b>0.040</b> |
| PHQ-9                  | 534 | 2.66<br>(4.18)   | <<br><b>.001</b> | -0.22<br>(0.76) | <<br><b>.001</b> | 0.01<br>(0.03)  | <b>0.007</b>     | 2.58<br>(1)        | 0.108        | <b>0.054</b> | <b>1.00</b> | <b>0.017</b> |
| WPAI<br>Overall >0     | 224 | 30.18<br>(10.09) | <<br><b>.001</b> | -2.66<br>(0.03) | <<br><b>.001</b> | 0.10<br>(0.16)  | 0.053            | 11.52<br>(1)       | <<br>.001    | 0.217        | <b>0.91</b> | 0.065        |
| WPAI<br>Overall        | 430 | 15.82<br>(13.77) | <<br><b>.001</b> | -0.95<br>(0.03) | <b>0.01</b>      | 0.03<br>(0.13)  | 0.313            | 9.02<br>(1)        | 0.003        | 0.132        | <b>0.96</b> | <b>0.044</b> |
| WPAI<br>Work >0        | 218 | 29.43<br>(12.9)  | <<br><b>.001</b> | -2.44<br>(0.03) | <<br><b>.001</b> | 0.08<br>(0.11)  | 0.071            | 10.51<br>(1)       | 0.001        | 0.209        | <b>0.93</b> | 0.063        |
| WPAI<br>Work           | 430 | 14.91<br>(13.84) | <<br><b>.001</b> | -0.87<br>(0.03) | <b>0.011</b>     | 0.03<br>(0.14)  | 0.304            | 7.45<br>(1)        | 0.006        | 0.118        | <b>0.97</b> | <b>0.040</b> |
| WPAI Ac-<br>tivity >0  | 390 | 35.70<br>(17.03) | <<br><b>.001</b> | -3.42<br>(3.04) | <<br><b>.001</b> | 0.16<br>(0.03)  | <<br><b>.001</b> | 5.15<br>(1)        | 0.023        | 0.103        | <b>0.98</b> | <b>0.032</b> |

|                    |     |                  |                  |                 |                  |                |              |             |              |              |             |              |
|--------------------|-----|------------------|------------------|-----------------|------------------|----------------|--------------|-------------|--------------|--------------|-------------|--------------|
| WPAI Ac-<br>tivity | 534 | 26.07<br>(18.54) | <<br><b>.001</b> | -2.13<br>(2.47) | <<br><b>.001</b> | 0.10<br>(0.03) | <b>0.002</b> | 2.36<br>(1) | <b>0.124</b> | <b>0.050</b> | <b>1.00</b> | <b>0.018</b> |
|--------------------|-----|------------------|------------------|-----------------|------------------|----------------|--------------|-------------|--------------|--------------|-------------|--------------|

**Abbreviations:** HOOS, Hip Disability and Osteoarthritis Outcome Score; GAD-7, Generalized Anxiety Disorder 7-item scale; PHQ-9, Patient Health 9-item questionnaire; WPAI, Work Productivity and Activity Impairment Questionnaire.

Each outcome average trajectory is described through intercept, slope and curve. The intercept refers to the initial estimated value at baseline, the slope the linear outcome mean change per week and the curve the possible leveling effect towards the end of the program. As an example, the average baseline score on Pain was 4.82 (SD 1.81), with a significant average reduction of 0.45 (SD 0.39) points per week.

Model fit estimation was assessed through chi-squared test, confirmatory fit index (CFI), root mean square error of approximation (RMSEA), and standardized root mean square residual (SRMR), based on the following thresholds: CFI = close to .95; RMSEA = close to .06 and SRMR = close to .08 [72,73]. Note: Significant p-values are presented in bold.

**Supplementary Table S4.** Effect of cumulative training time on the slopes of recovery trajectories for the different outcome variables.

| Outcome           | Estimate | P            |
|-------------------|----------|--------------|
| Hoos-Pain         | 0.000    | 0.933        |
| Hoos-Function     | 0.000    | 0.974        |
| Hoos-QoL          | -0.011   | <b>0.009</b> |
| Hoos-Sport        | -0.004   | 0.517        |
| Hoos-Symptoms     | -0.006   | 0.152        |
| Pain Level        | -0.001   | 0.083        |
| Surgery Intent >0 | -0.012   | <b>0.048</b> |
| Surgery Intent    | -0.005   | 0.083        |
| GAD-7 $\geq 5$    | -0.003   | 0.192        |
| GAD-7             | 0.000    | 0.568        |
| PHQ-9 $\geq 5$    | -0.002   | 0.456        |
| PHQ-9             | -0.001   | 0.911        |
| WPAI Overall > 0  | -0.020   | <b>0.049</b> |
| WPAI Overall      | -0.015   | <b>0.002</b> |
| WPAI Work > 0     | -0.018   | <b>0.043</b> |
| WPAI Work         | -0.015   | <b>0.001</b> |
| WPAI Activity > 0 | -0.010   | 0.138        |
| WPAI Activity     | -0.006   | 0.306        |

**Abbreviations:** HOOS, Hip Disability and Osteoarthritis Outcome Score; GAD-7, Generalized Anxiety Disorder 7-item scale; PHQ-9, Patient Health 9-item questionnaire; WPAI, Work Productivity and Activity Impairment Questionnaire.

A negative estimate refers to an end score lower than the average. E.g: for HOOS QoL, each hour performed above the average cumulative time dedicated to exercise (mean 421.1 minutes), would result in a final score of 4.632 points lower than the average at the end the program. Significant p-values are presented in bold.
